# Supplementary material for: Formation of drug nanocrystals under nanoconfinement afforded by liposomes
Source: Royal Society of Chemistry journal article supplement (doi:10.1039/c5ra25898g), 2016-01-01
Supplement: c5ra25898g5.pdf [file c5ra25898g5.pdf]

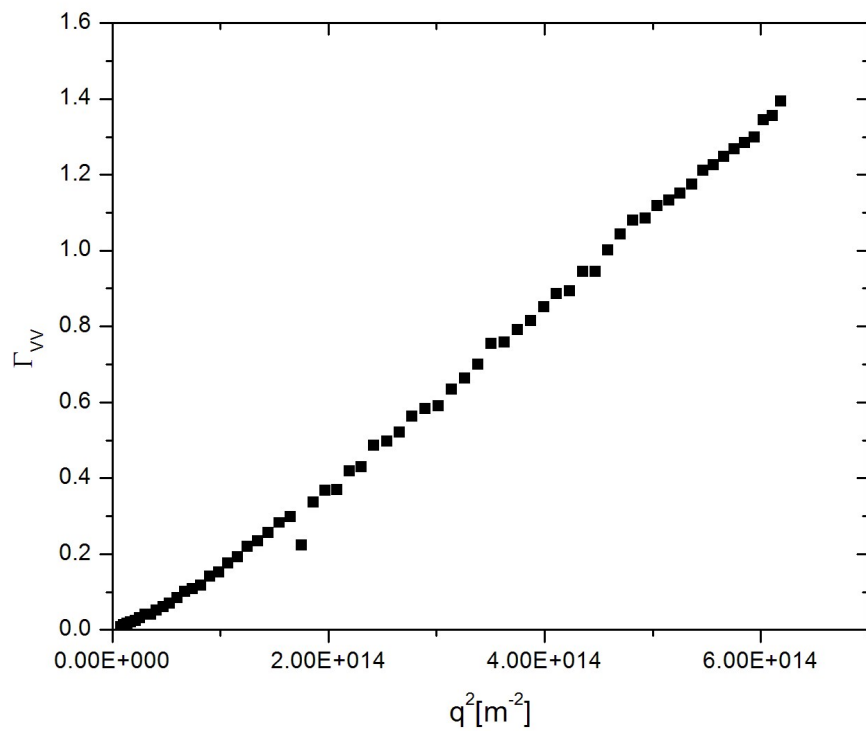

**Figure S1:** DLS measurements in normal (VV) mode for Sample 1 (liposomes with no internal sucrose).  $\Gamma_{VV}$  is the decay rate of the field correlation function ( $g_1^{VV}(t)$ ).  $\Gamma_{VV}$  was determined from the correlation function by cumulant expansion. Each data point represents a DLS measurement.  $\Gamma_{VV}$  increases with  $q^2$  (characteristic for rod-like particles).

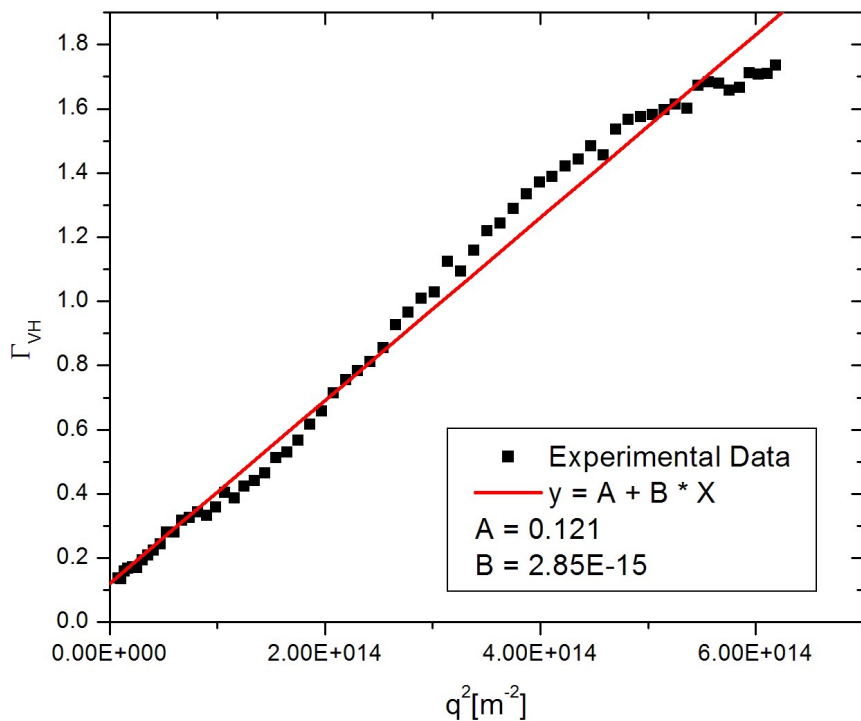

**Figure S2:** Sample 1 (liposomes with no internal sucrose) measured in depolarized (VH) mode. In DDLS the scattering is due to optically anisotropic particles. Here, decay rate of the field correlation function is given by  $\Gamma_{VH} = q^2 D_T + 6D_R$ ,  $\Gamma_{VH}$  is the decay rate of the depolarized field correlation function ( $g_I^{VH}(t)$ ).  $\Gamma_{VH}$  was determined from the correlation function by cumulant expansion. The resulting values for plotted versus  $q^2$  and  $D_T$  and  $D_R$  for the anisotropic particles are evaluated by linear regression.

**Table S1:** Similarity Factor Analysis ( $f_2$ ) for the liposomes containing 17.1 mg/mL internal sucrose (Intermediate) before (control) and after freeze-thaw (nanocrystal) versus the control liposomes without internal sucrose. Shaded cells indicate lack of similarity.

| Test                             | Reference          |                              |                                  |
|----------------------------------|--------------------|------------------------------|----------------------------------|
|                                  | No sucrose control | Intermediate sucrose control | Intermediate sucrose nanocrystal |
| No sucrose control               | 100                | 68.0                         | 32.6                             |
| Intermediate sucrose control     | 68.0               | 100                          | 36.5                             |
| Intermediate sucrose nanocrystal | 32.6               | 36.5                         | 100                              |

**Table S2:** Similarity Factor Analysis ( $f_2$ ) for the liposomes containing 51.3 mg/mL internal sucrose (High) before (control) and after freeze-thaw (nanocrystal) versus the control liposomes without internal sucrose. Shaded cells indicate lack of similarity.

| Test                     | Reference          |                      |                          |
|--------------------------|--------------------|----------------------|--------------------------|
|                          | No sucrose control | High sucrose control | High sucrose nanocrystal |
| No sucrose control       | 100                | 71.7                 | 46.2                     |
| High sucrose control     | 71.1               | 100                  | 41.3                     |
| High sucrose nanocrystal | 46.2               | 41.3                 | 100                      |
